# Supplementary material for: Preoperative Serum Metabolites and Potential Biomarkers for Perioperative Cognitive Decline in Elderly Patients
Source: Front Psychiatry. 2021 May 20;12:665097. doi: 10.3389/fpsyt.2021.665097 (PMC8174563; doi:10.3389/fpsyt.2021.665097)
Supplement: Supplementary file 1 [file Table_1.XLSX]

## Sheet: Supplementary Table1
NO.	Pathway Name	Metabolite	KEGG ID	Match Status	p	-log(p)	Holm p	FDR	Impact	Details
1	Glycerophospholipid metabolism	Choline	C00114	4/39	0.0042331	5.4648	0.33865	0.33865	0.07008	KEGG
		Phosphocholine	C00588
		Acetylcholine	C01996
		LysoPC(16:0)	C04230
		LysoPC(15:0)	C04230
2	Aminoacyl-tRNA biosynthesis	L-Methionine	C00073	4/75	0.039795	3.224	1	1	0	KEGG
		L-Phenylalanine	C00079
		L-Proline	C00148
		L-Valine	C00183
3	Arginine and proline metabolism	Ornithine	C00077	4/77	0.043215	3.1416	1	1	0.2575	KEGG SMP
		L-Proline	C00148
		gamma-Aminobutyric acid	C00334
		S-Adenosylmethioninamine	C01137
4	Cysteine and methionine metabolism	L-Methionine	C00073	3/56	0.072321	2.6266	1	1	0.03995	KEGG SMP SMP
		O-Acetylserine	C00979
		S-Adenosylmethioninamine	C01137
5	Pantothenate and CoA biosynthesis	β-Alanine	C00099	2019-02-27	0.079279	2.5348	1	1	0.07286	KEGG SMP
		L-Valine	C00183
6	beta-Alanine metabolism	gamma-Aminobutyric acid	C00334	2019-02-28	0.084458	2.4715	1	1	0.25694	KEGG SMP
		β-Alanine	C00099
7	Propanoate metabolism	β-Alanine	C00099	2/35	0.12329	2.0932	1	1	0.085	KEGG SMP
		L-Valine	C00183
8	D-Arginine and D-ornithine metabolism	Ornithine	C00077	2019-01-08	0.13154	2.0285	1	1	0	KEGG
9	Primary bile acid biosynthesis	Cholic acid	C00695	2/47	0.19714	1.6238	1	1	0.00054	KEGG SMP
		Chenodeoxycholic Acid	C02528
10	Purine metabolism	guanosine monophosphate	C00144	3/92	0.21496	1.5373	1	1	0.05055	KEGG SMP
		Uric acid	C00366
		Allantoic acid	C00499
11	Linoleic acid metabolism	Linoleic acid	C01595	2019-01-15	0.23266	1.4582	1	1	0.65625	KEGG SMP
12	Sulfur metabolism	O-Acetylserine	C00979	2019-01-18	0.27239	1.3005	1	1	0.03898	KEGG SMP
13	Pyrimidine metabolism	β-Alanine	C00099	2/60	0.28177	1.2667	1	1	0.02061	KEGG SMP
		Uridine	C00299
14	Taurine and hypotaurine metabolism	Acetylphosphate	C00227	2019-01-20	0.29775	1.2115	1	1	0.11151	KEGG SMP
15	Riboflavin metabolism	Riboflavin	C00255	2019-01-21	0.31011	1.1708	1	1	0.14504	KEGG SMP
16	Selenoamino acid metabolism	O-Acetylserine	C00979	2019-01-22	0.32225	1.1324	1	1	0.00482	KEGG SMP
17	Alanine, aspartate and glutamate metabolism	gamma-Aminobutyric acid	C00334	2019-01-24	0.34592	1.0615	1	1	0.10256	KEGG SMP SMP SMP
18	Phenylalanine, tyrosine and tryptophan biosynthesis	L-Phenylalanine	C00079	2019-01-27	0.37991	0.96782	1	1	0.00062	KEGG SMP
19	Valine, leucine and isoleucine biosynthesis	L-Valine	C00183	2019-01-27	0.37991	0.96782	1	1	0.01325	KEGG SMP
20	Tyrosine metabolism	Norepinephrine	C00547	2/76	0.38517	0.95408	1	1	0.11039	KEGG SMP SMP
		Dopamine	C03758
21	alpha-Linolenic acid metabolism	α-Linolenic Acid	C06427	2019-01-29	0.40161	0.91228	1	1	0.20335	KEGG SMP
22	Glycolysis or Gluconeogenesis	α-D-Glucose	C00267	2019-01-31	0.42256	0.86141	1	1	0.01094	KEGG SMP SMP
23	Pyruvate metabolism	Acetylphosphate	C00227	1/32	0.43277	0.83755	1	1	0	KEGG SMP
24	Glutathione metabolism	Ornithine	C00077	1/38	0.49042	0.7125	1	1	0	KEGG SMP
25	Nitrogen metabolism	L-Phenylalanine	C00079	1/39	0.49945	0.69425	1	1	0	KEGG SMP
26	Valine, leucine and isoleucine degradation	L-Valine	C00183	1/40	0.50833	0.67663	1	1	0	KEGG SMP
27	Butanoate metabolism	gamma-Aminobutyric acid	C00334	1/40	0.50833	0.67663	1	1	0.01067	KEGG SMP
28	Galactose metabolism	α-D-Glucose	C00267	1/41	0.51705	0.65961	1	1	0.00246	KEGG SMP
29	Nicotinate and nicotinamide metabolism	Niacin	C00153	1/44	0.54233	0.61188	1	1	0.03827	KEGG SMP
30	Ascorbate and aldarate metabolism	Threonic acid	C01620	1/45	0.55046	0.597	1	1	0.00802	KEGG
31	Phenylalanine metabolism	L-Phenylalanine	C00079	1/45	0.55046	0.597	1	1	0.11906	KEGG SMP
32	Lysine degradation	Glutaric acid	C00489	1/47	0.56631	0.56861	1	1	0.06505	KEGG SMP
33	Glycine, serine and threonine metabolism	Choline	C00114	1/48	0.57403	0.55507	1	1	0	KEGG SMP
34	Fructose and mannose metabolism	α-D-Glucose	C00267	1/48	0.57403	0.55507	1	1	0.00471	KEGG SMP
35	Fatty acid biosynthesis	Oleic Acid	C00712	1/49	0.58161	0.54195	1	1	0	KEGG SMP
36	Fatty acid metabolism	Glutaric acid	C00489	1/50	0.58907	0.52922	1	1	0	KEGG SMP
37	Glyoxylate and dicarboxylate metabolism	Phosphoglycolic acid	C00988	1/50	0.58907	0.52922	1	1	0.00158	KEGG
38	Starch and sucrose metabolism	α-D-Glucose	C00267	1/50	0.58907	0.52922	1	1	0.03116	KEGG SMP
39	Tryptophan metabolism	Indolelactic acid	C02043	1/79	0.7568	0.27865	1	1	0	KEGG SMP
40	Amino sugar and nucleotide sugar metabolism	α-D-Glucose	C00267	1/88	0.79362	0.23115	1	1	0	KEGG SMP SMP
41	Steroid hormone biosynthesis	Cortisol	C00735	1/99	0.83128	0.18479	1	1	0.02959	KEGG SMP

## Sheet: Supplementary Table2
NO.	Pathway Name	Metabolite	KEGG ID	Match Status	p	-log(p)	Holm p	FDR	Impact	Details
1	Aminoacyl-tRNA biosynthesis	L-Lysine	C00047	7/75	2.5233e-06	12.89	0.00020186	0.00020186	0.05634	KEGG
		L-Glutamine	C00064
		L-Phenylalanine	C00079
		L-Leucine	C00123
		L-Histidine	C00135
		L-Valine	C00183
		L-Threonine	C00188
2	Valine, leucine and isoleucine biosynthesis	L-Leucine	C00123	2019-04-27	8.0128e-05	9.4319	0.0063301	0.0032051	0.03392	KEGG SMP
		L-Valine	C00183
		L-Threonine	C00188
		Citraconic acid	C02226
3	Citrate cycle (TCA cycle)	Oxoglutaric acid	C00026	2019-03-20	0.00068363	7.2881	0.053323	0.01823	0.20415	KEGG SMP
		Citric acid	C00158
		Aconitic acid	C00417
4	D-Glutamine and D-glutamate metabolism	Oxoglutaric acid	C00026	2019-02-11	0.0041739	5.4789	0.32139	0.078339	0.02674	KEGG SMP
		L-Glutamine	C00064
5	Nitrogen metabolism	L-Glutamine	C00064	3/39	0.0048962	5.3193	0.37211	0.078339	0	KEGG SMP
		L-Phenylalanine	C00079
		L-Histidine	C00135
6	Glyoxylate and dicarboxylate metabolism	Oxoglutaric acid	C00026	3/50	0.0098381	4.6215	0.73786	0.13117	0.00643	KEGG
		Citric acid	C00158
		Aconitic acid	C00417
7	Alanine, aspartate and glutamate metabolism	Oxoglutaric acid	C00026	2019-02-24	0.019493	3.9377	1	0.22278	0.20703	KEGG SMP SMP SMP
		L-Glutamine	C00064
8	Lysine biosynthesis	Oxoglutaric acid	C00026	2/32	0.033523	3.3955	1	0.33523	0.09993	KEGG SMP
		L-Lysine	C00047
9	Purine metabolism	L-Glutamine	C00064	3/92	0.049189	3.0121	1	0.40364	0.03867	KEGG SMP
		guanosine monophosphate	C00144
		Uric acid	C00366
10	Valine, leucine and isoleucine degradation	L-Leucine	C00123	2/40	0.050455	2.9867	1	0.40364	0.02232	KEGG SMP
		L-Valine	C00183
11	Histidine metabolism	Oxoglutaric acid	C00026	2/44	0.059869	2.8156	1	0.43541	0.13988	KEGG SMP
		L-Histidine	C00135
12	Cysteine and methionine metabolism	L-Cystine	C00491	2/56	0.091295	2.3937	1	0.59237	0.01478	KEGG SMP SMP
		O-Acetylserine	C00979
13	Biotin metabolism	L-Lysine	C00047	2019-01-11	0.09626	2.3407	1	0.59237	0	KEGG SMP
14	Sulfur metabolism	O-Acetylserine	C00979	2019-01-18	0.15284	1.8784	1	0.82588	0.03898	KEGG SMP
15	Arginine and proline metabolism	L-Glutamine	C00064	2/77	0.15485	1.8653	1	0.82588	0	KEGG SMP
		Phosphocreatine	C02305
16	Selenoamino acid metabolism	O-Acetylserine	C00979	2019-01-22	0.18364	1.6948	1	0.91134	0.00482	KEGG SMP
17	Sphingolipid metabolism	Sphinganine 1-phosphate	C01120	2019-01-25	0.20603	1.5797	1	0.91134	0.01717	KEGG SMP
18	Pantothenate and CoA biosynthesis	L-Valine	C00183	2019-01-27	0.22063	1.5113	1	0.91134	0	KEGG SMP
19	Phenylalanine, tyrosine and tryptophan biosynthesis	L-Phenylalanine	C00079	2019-01-27	0.22063	1.5113	1	0.91134	0.00062	KEGG SMP
20	beta-Alanine metabolism	L-Histidine	C00135	2019-01-28	0.22783	1.4791	1	0.91134	0	KEGG SMP
21	Vitamin B6 metabolism	Oxoglutaric acid	C00026	1/32	0.25602	1.3625	1	0.97532	0.01914	KEGG SMP
22	Propanoate metabolism	L-Valine	C00183	1/35	0.27651	1.2855	1	0.98973	0	KEGG SMP
23	Glutathione metabolism	Pyroglutamic acid	C01879	1/38	0.29647	1.2158	1	0.98973	0.0019	KEGG SMP
24	Glycerophospholipid metabolism	LysoPC(15:0)	C04230	1/39	0.303	1.194	1	0.98973	0.00317	KEGG
25	Butanoate metabolism	Oxoglutaric acid	C00026	1/40	0.30948	1.1729	1	0.98973	0	KEGG SMP
26	Ascorbate and aldarate metabolism	Oxoglutaric acid	C00026	1/45	0.341	1.0759	1	0.98973	0	KEGG
27	Phenylalanine metabolism	L-Phenylalanine	C00079	1/45	0.341	1.0759	1	0.98973	0.11906	KEGG SMP
28	Lysine degradation	L-Lysine	C00047	1/47	0.35322	1.0407	1	0.98973	0.14675	KEGG SMP
29	Glycine, serine and threonine metabolism	L-Threonine	C00188	1/48	0.35925	1.0237	1	0.98973	0.09661	KEGG SMP
30	Fatty acid metabolism	L-Palmitoylcarnitine	C02990	1/50	0.37115	0.99115	1	0.98973	0	KEGG SMP
31	Pyrimidine metabolism	L-Glutamine	C00064	1/60	0.42754	0.8497	1	1	0	KEGG SMP
32	Porphyrin and chlorophyll metabolism	L-Threonine	C00188	1/104	0.62321	0.47287	1	1	0	KEGG
